# Supplementary material for: Aromatherapeutic and Antibacterial Properties of Cotton Materials Treated with Emulsions Containing Peppermint Essential Oil (Menthae piperitae aetheroleum)
Source: MDPI journal article supplement (doi:10.3390/polym15102348), 2023-05-17
Supplement: s1 [file s1]

## Identified Compounds, Peak Area and Area Percentage

The data obtained after the analysis of the samples are presented in Figures S1–12 and Tables S1–13

### 1. GC-MS Chromatograms

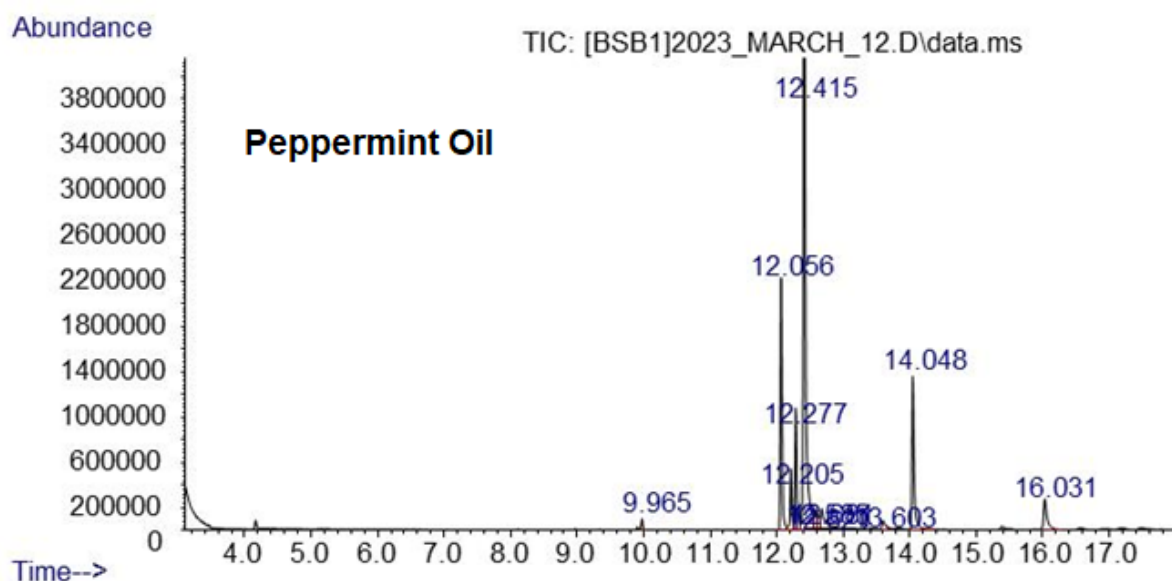

**Figure S1.** GC-MS chromatogram of peppermint essential oil.

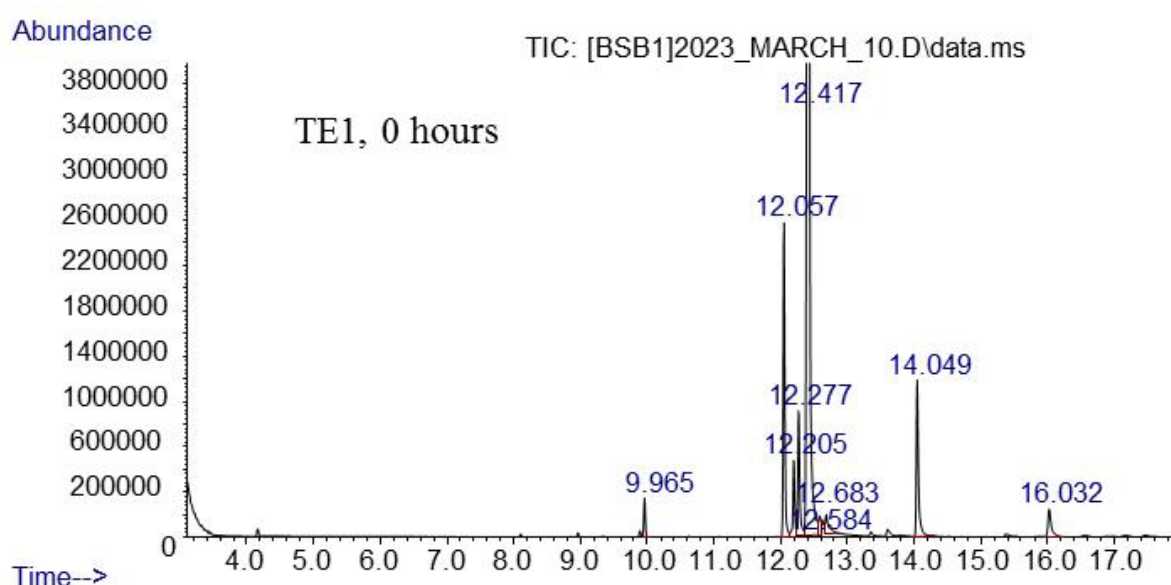

**Figure S2.** GC-MS chromatogram of sample TE1 at 0 hours.

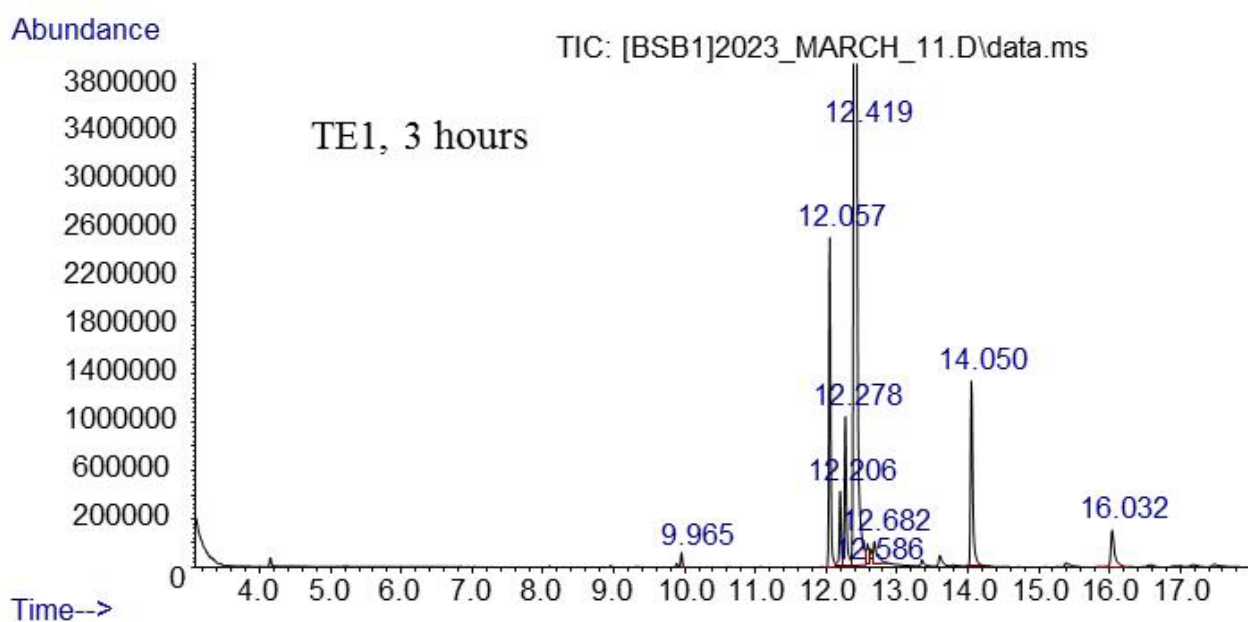

Figure S3. GC-MS chromatogram of sample TE1 at 3 hours.

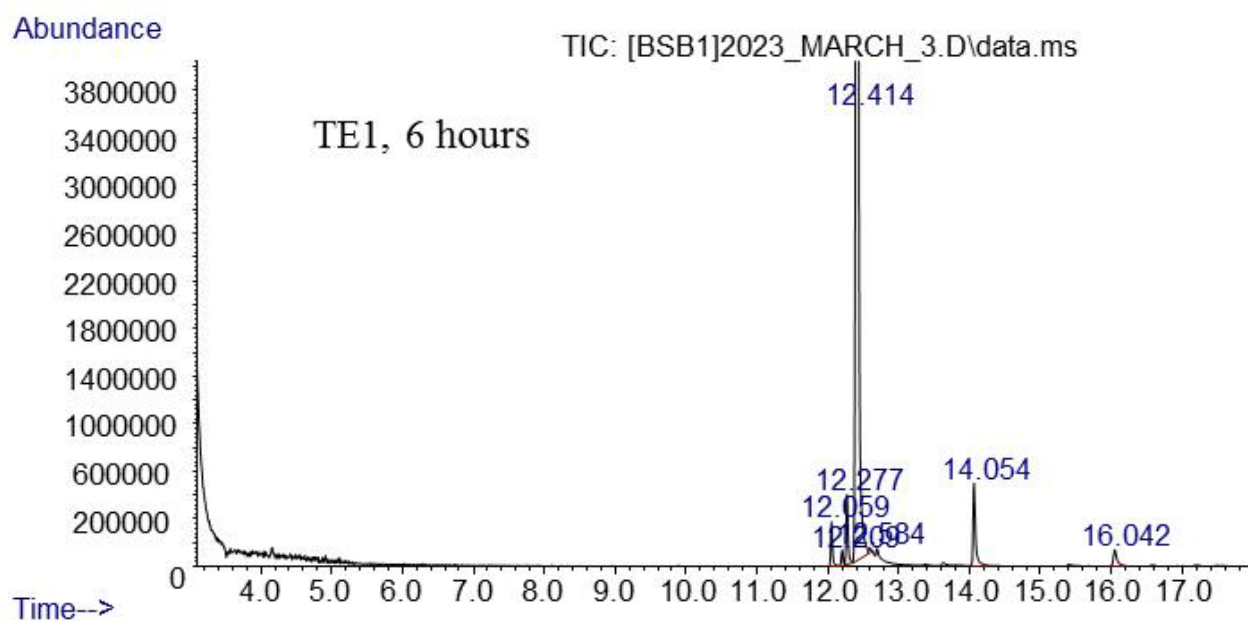

Figure S4. GC-MS chromatogram of sample TE1 at 6 hours.

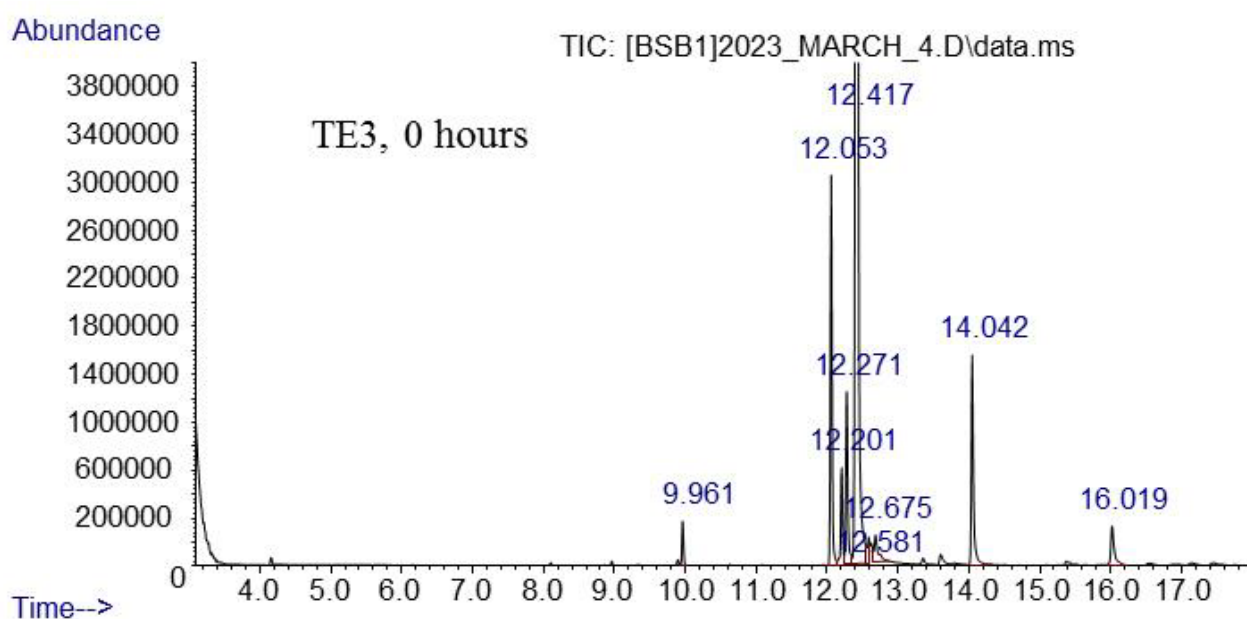

Figure S5. GC-MS chromatogram of sample TE3 at 0 hours.

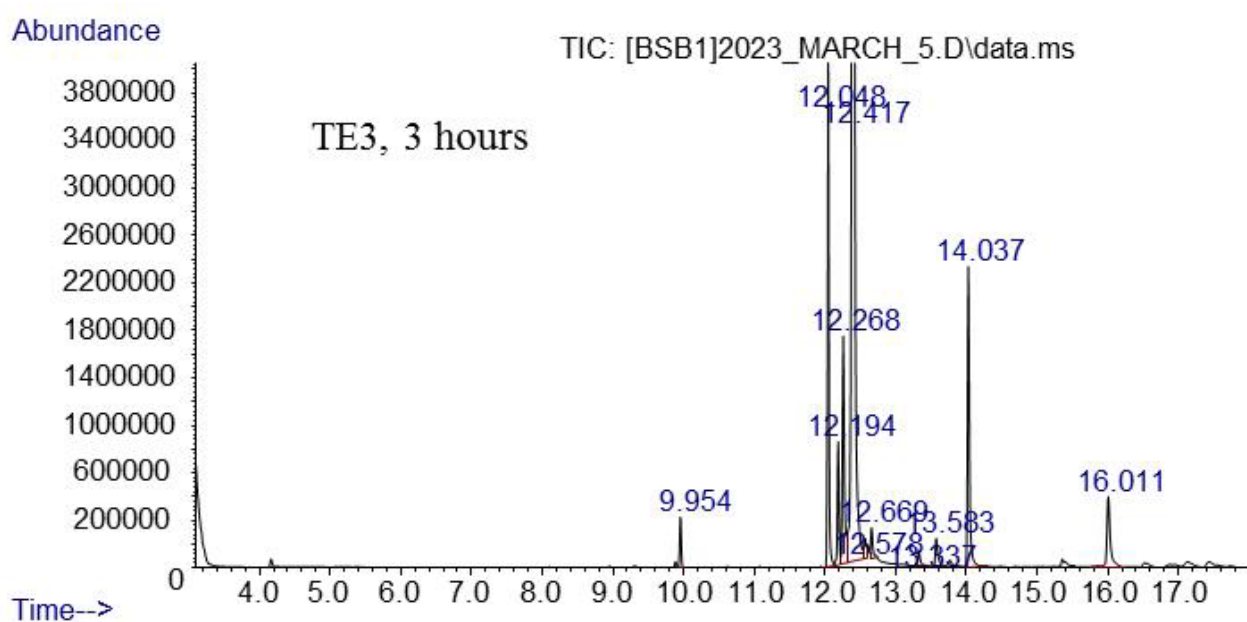

Figure S6. GC-MS chromatogram of sample TE3 at 3 hours.

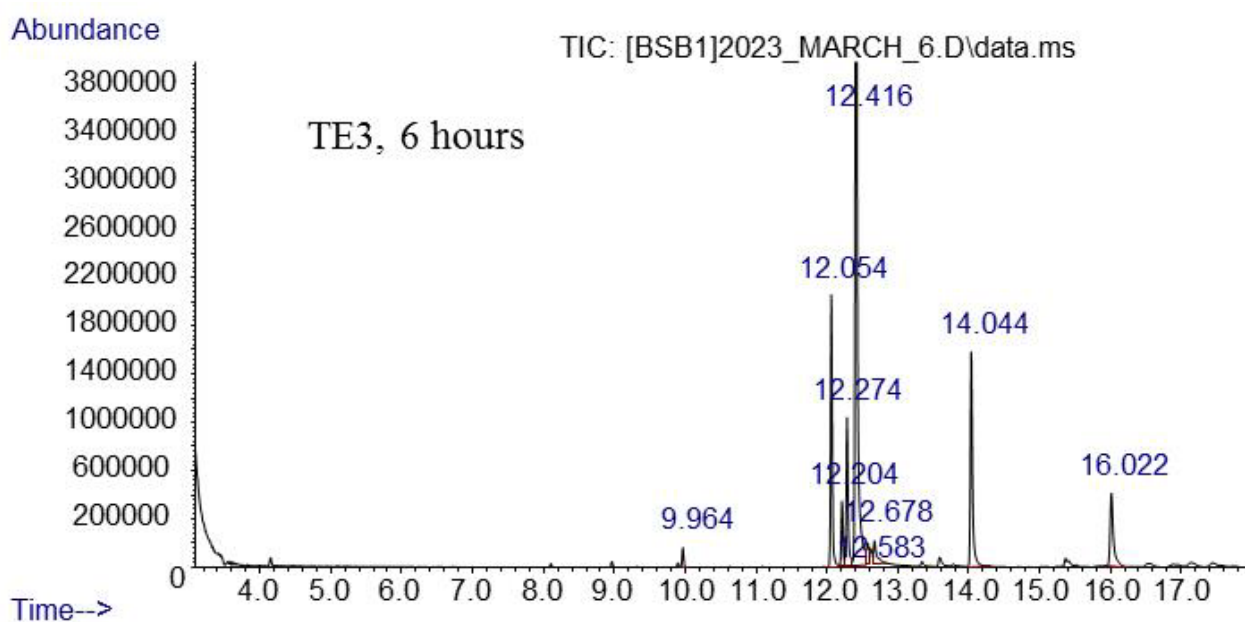

Figure S7. GC-MS chromatogram of sample TE3 at 6 hours.

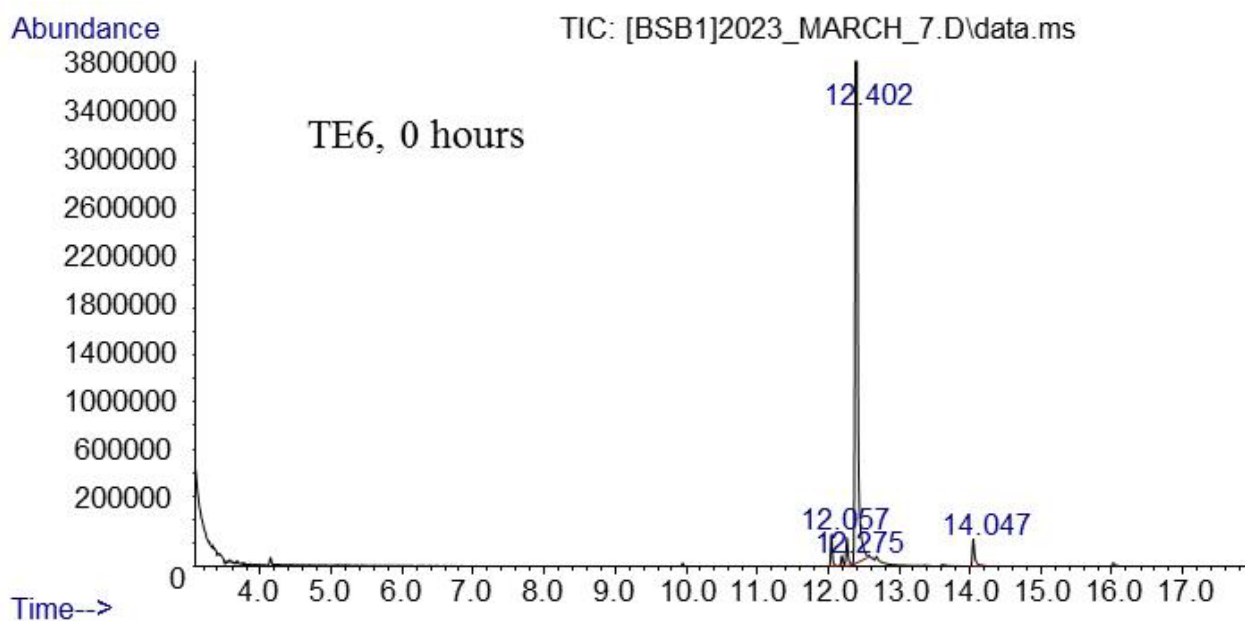

Figure S8. GC-MS chromatogram of sample TE6 at 0 hours.

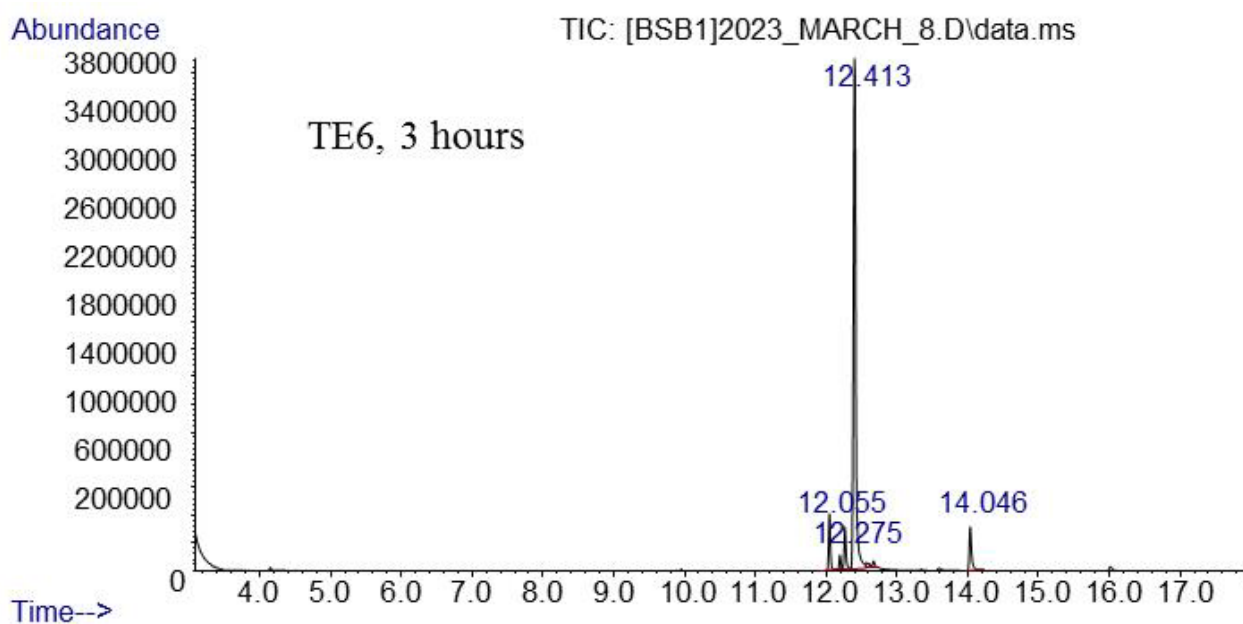

Figure S9. GC-MS chromatogram of sample TE6 at 3 hours.

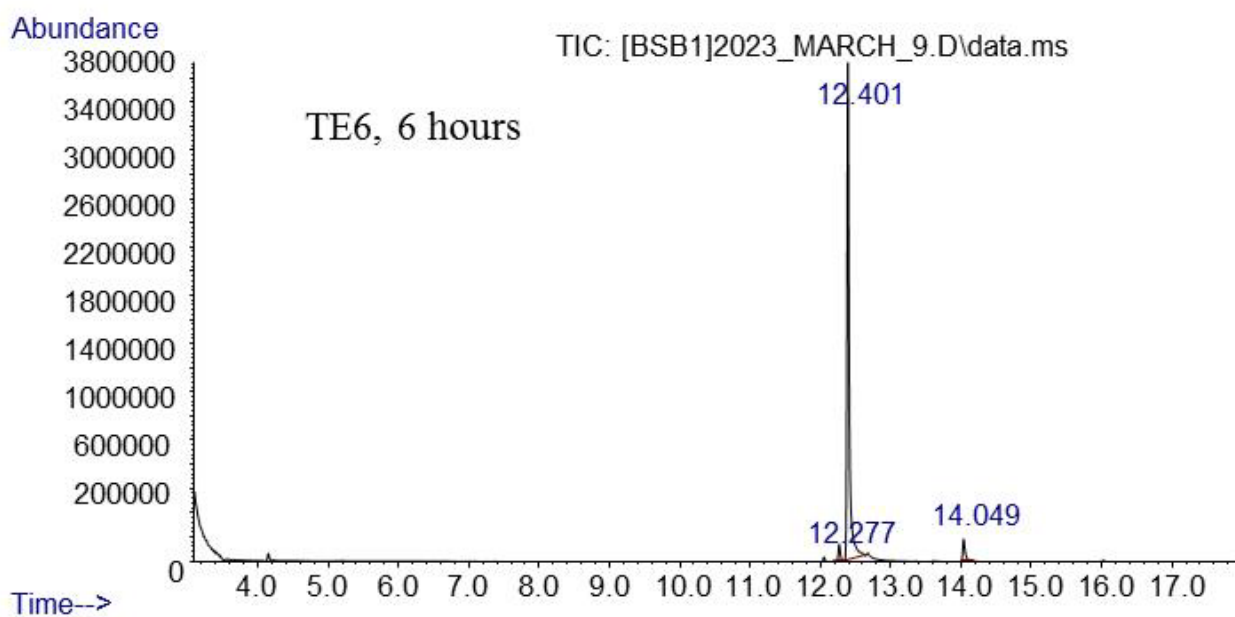

Figure S10. GC-MS chromatogram of sample TE6 at 6 hours.

## 2. Antimicrobial Activity

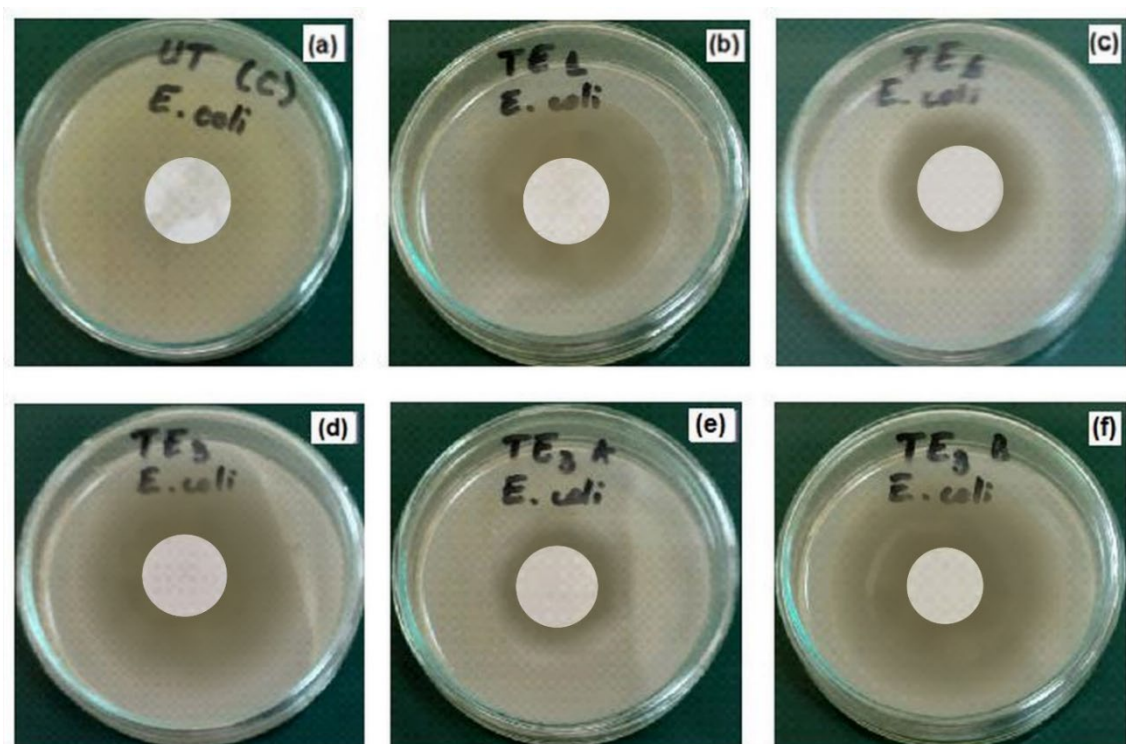

**Figure S11.** Antimicrobial activity of the untreated sample (a) and of the treated samples TE1 (b), TE6 (c), TE3 (d), TE3A (e) and TE3B (f) against *E. coli*.

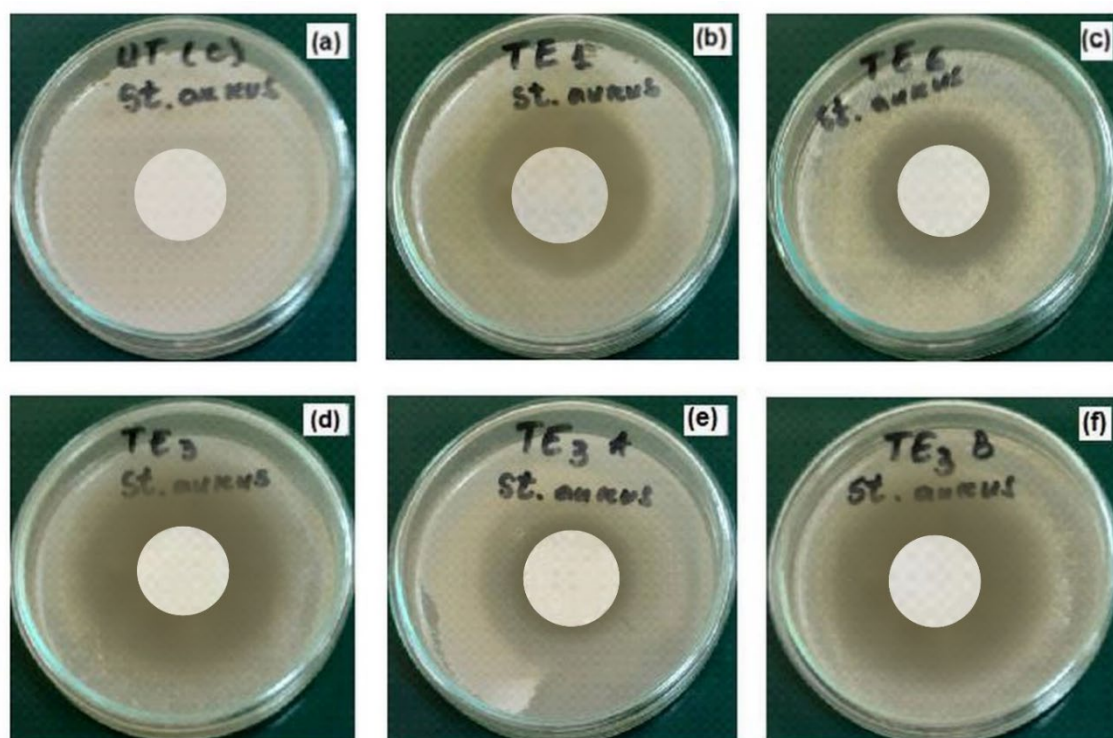

**Figure S12.** Antimicrobial activity of the untreated sample (a) and of the treated samples TE1 (b), TE6 (c), TE3 (d), TE3A (e) and TE3B (f) against *S. aureus*.

### 3. Chemical Composition Determined Using the GCSM Method

**Table S1.** Chemical composition of peppermint essential oil.

| Pk# | Rt     | Name (CAS)                                                                                                                                         | Name                 | Area % |
|-----|--------|----------------------------------------------------------------------------------------------------------------------------------------------------|----------------------|--------|
| 1   | 8.103  | 2,5-Cyclohexadiene-1-carboxylic acid, 1-methyl-, methyl ester (CAS)                                                                                |                      | 0.03   |
| 2   | 8.964  | 7-Methyl-3-methylene-1,6-octadiene                                                                                                                 | Myrcene              | 0.05   |
| 3   | 9.897  | Cyclohexene, 1-methyl-4-(1-methylethenyl)-, (S)-                                                                                                   | Limonene             | 0.12   |
| 4   | 9.962  | 2-Oxabicyclo[2.2.2]octane, 1,3,3-trimethyl- (CAS)                                                                                                  | 1,8-Cineole          | 0.42   |
| 5   | 12.056 | Cyclohexanone, 5-methyl-2-(1-methylethyl)- (CAS)                                                                                                   | Menthone             | 10.12  |
| 6   | 12.206 | Cyclohexanone, 5-methyl-2-(1-methylethyl)- (CAS)                                                                                                   | Menthone             | 2.66   |
| 7   | 12.278 | Cyclohexene, 4-methyl-1-(1-methylethyl)- (CAS)                                                                                                     | 3-p-Menthene         | 5.67   |
| 8   | 12.415 | Cyclohexanol, 5-methyl-2-(1-methylethyl)-, (1.alpha.,2.beta.,5.alpha.)-(+)-                                                                        | Menthol, (.+.)-      | 62.87  |
| 9   | 12.584 | Bicyclo[4.1.0]heptane, 3,7,7-trimethyl-, (1.alpha.,3.alpha.,6.alpha.)- (CAS)                                                                       | trans-Carane         | 1.93   |
| 10  | 12.624 |                                                                                                                                                    |                      |        |
| 11  | 12.682 | Bicyclo[2.2.1]heptane, 2,2-dimethyl-3-methylene- (CAS)                                                                                             | Camphene             | 3.15   |
| 12  | 13.354 | Cyclohexanone, 5-methyl-2-(1-methylethylidene)-, (R)- (CAS)                                                                                        | Pulegone             | 0.5    |
| 13  | 13.602 | 2-Cyclohexen-1-one, 3-methyl-6-(1-methylethyl)- (CAS)                                                                                              | Piperitone           | 0.79   |
| 14  | 13.791 | 3,5-Octadiene, 2,7-dimethyl-, (E,Z)- (CAS)                                                                                                         |                      | 0.22   |
| 15  | 14.046 | Cyclohexene, 4-methyl-1-(1-methylethyl)- (CAS)                                                                                                     | 3-p-Menthene         | 7.49   |
| 16  | 15.383 | Cyclobuta[1,2:3,4]dicyclopentene, decahydro-3a-methyl-6-methylene-1-(1-methylethyl)-, [1S-(1.alpha.,3a.alpha.,3b.beta.,6a.beta.,6b.alpha.)]- (CAS) | .beta.-Bourbonene    | 0.13   |
| 17  | 15.422 | Bicyclo[3.2.0]hept-3-en-6-one, 4,7,7-trimethyl-                                                                                                    | Filifolone           | 0.09   |
| 18  | 16.029 | Bicyclo[7.2.0]undec-4-ene, 4,11,11-trimethyl-8-methylene-, [1R-(1R*,4E,9S*)]- (CAS)                                                                | .beta.-Caryophyllene | 2.59   |
| 19  | 16.55  | 1,4,8-Cycloundec-4-ene, (E,E,E)- (CAS)                                                                                                             | .alpha.-Humulene     | 0.28   |
| 20  | 16.903 | 1-Methyl-5-methylene-8-isopropyl-1,6-cyclodecadiene                                                                                                | Germacrene-D         | 0.12   |
| 21  | 16.974 | 1H-Cycloprop[e]azulene, decahydro-1,1,7-trimethyl-4-methylene-, [1aR-(1a.alpha.,4a.beta.,7a.alpha.,7a.beta.,7b.alpha.)]- (CAS)                     | Alloaromadendrene    | 0.05   |
| 22  | 17.17  | Naphthalene, 1,2,4a,5,6,8a-hexahydro-4,7-dimethyl-1-(1-methylethyl)-, (1.alpha.,4a.alpha.,8a.alpha.)- (CAS)                                        | .alpha.-Muurolene    | 0.33   |
| 23  | 17.483 | Tricyclo[4.4.0.0(2,7)]dec-3-ene, 1,3-dimethyl-8-(1-methylethyl)-, stereoisomer (CAS)                                                               | .alpha.-Copaene      | 0.38   |

**Table S2.** Identified compounds, peak area and area percentage in sample TE1.0 at 0 hours.

| Pk#   | Rt     | Name (CAS)                                                                          | Name                          | Peak Area | Area % |
|-------|--------|-------------------------------------------------------------------------------------|-------------------------------|-----------|--------|
| 1     | 9.897  | Cyclohexene, 1-methyl-4-(1-methylethenyl)-, (S)- (CAS)                              | l-Limonene                    | 928871    | 0.23   |
| 2     | 9.962  | 2-Oxabicyclo[2.2.2]octane, 1,3,3-trimethyl- (CAS)                                   | 1,8-Cineole                   | 5466465   | 1.38   |
| 3     | 12.056 | Cyclohexanone, 5-methyl-2-(1-methylethyl)- (CAS)                                    | Menthone                      | 60454279  | 15.25  |
| 4     | 12.206 |                                                                                     |                               |           |        |
| 5     | 12.278 | Cyclohexane, 1-methyl-4-(1-methylethylidene)- (CAS)                                 | 4(8)-p-Menthene               | 22921087  | 5.78   |
| 6     | 12.415 | Cyclohexanol, 5-methyl-2-(1-methylethyl)-, [1R-(1.alpha.,2.beta.,5.alpha.)]- (CAS)  | Menthol                       | 248126474 | 62.6   |
| 7     | 12.584 | Bicyclo[4.1.0]heptane, 3,7,7-trimethyl- (CAS)                                       | Carane                        | 7589047   | 1.92   |
| 8     | 12.624 |                                                                                     |                               |           |        |
| 9     | 12.682 | Bicyclo[2.2.1]heptane, 2,2-dimethyl-3-methylene- (CAS)                              | Camphene                      | 9175667   | 2.31   |
| 10    | 13.609 |                                                                                     | Piperitone                    | 2233647   | 0.56   |
| 11    | 14.046 | Cyclohexene, 4-methyl-1-(1-methyle                                                  | 3-p-Menthene (Menthomenthene) | 30744624  | 7.76   |
| 12    | 16.035 | Bicyclo[7.2.0]undec-4-ene, 4,11,11-trimethyl-8-methylene-, [1R-(1R*,4E,9S*)]- (CAS) | .BETA.-Caryophyllene          | 8747829   | 2.21   |
| Total |        |                                                                                     |                               | 396387990 |        |

**Table S3.** Identified compounds, peak area and area percentage in sample TE1.3 at 3 hours.

| Pk#   | Rt     | Name (CAS)                                                                         | Name                 | Peak Area | Area % |
|-------|--------|------------------------------------------------------------------------------------|----------------------|-----------|--------|
| 1     | 9.962  | 2-Oxabicyclo[2.2.2]octane, 1,3,3-trimethyl- (CAS)                                  | 1,8-Cineole          | 1766896   | 0.48   |
| 2     | 12.056 | Cyclohexanone, 5-methyl-2-(1-methylethyl)- (CAS)                                   | Menthone             | 51707145  | 14.03  |
| 3     | 12.206 |                                                                                    |                      |           |        |
| 4     | 12.278 | Cyclohexane, 1-methyl-4-(1-methylethylidene)- (CAS)                                | 4(8)-p-Menthene      | 21847967  | 5.93   |
| 5     | 12.421 | Cyclohexanol, 5-methyl-2-(1-methylethyl)-, [1R-(1.alpha.,2.beta.,5.alpha.)]- (CAS) | Menthol              | 240972890 | 65.39  |
| 6     | 12.584 | Bicyclo[4.1.0]heptane, 3,7,7-trimethyl-, (1.alpha.,3.alpha.,6.alpha.)- (CAS)       | trans-Carane         | 4197210   | 1.14   |
| 7     | 12.623 |                                                                                    |                      |           |        |
| 8     | 12.682 | Bicyclo[2.2.1]heptane, 2,2-dimethyl-3-methylene- (CAS)                             | Camphene             | 2813396   | 0.76   |
| 9     | 13.354 | Pulegone                                                                           | Pulegone             | 1404062   | 0.38   |
| 10    | 13.602 | Piperitone                                                                         | Piperitone           | 2848759   | 0.77   |
| 11    | 14.052 | Cyclohexene, 4-methyl-1-(1-methylethyl)- (CAS)                                     | 3-p-Menthene         | 30858819  | 8.37   |
| 12    | 16.035 | .BETA.-Caryophyllene                                                               | .beta.-Caryophyllene | 10104471  | 2.74   |
| Total |        |                                                                                    |                      | 368521615 |        |

**Table S4.** Identified compounds, peak area and area percentage in sample TE1.6 at 6 hours.

| Pk#   | Rt     | Name (CAS)                                                                          | Name                 | Peak Area | Area% |
|-------|--------|-------------------------------------------------------------------------------------|----------------------|-----------|-------|
| 1     | 12.056 | Cyclohexanone, 5-methyl-2-(1-methylethyl)- (CAS)                                    | Menthone             | 8960467   | 3.58  |
| 2     | 12.213 |                                                                                     |                      |           |       |
| 3     | 12.278 | Cyclohexane, 1-methyl-4-(1-methylethylidene)- (CAS)                                 | p-Menth-4(8)-ene     | 12444760  | 4.97  |
| 4     | 12.415 | Cyclohexanol, 5-methyl-2-(1-methylethyl)-, [1R-(1.alpha.,2.beta.,5.alpha.)]- (CAS)  | L-(-)-Menthol        | 192997105 | 77.14 |
| 5     | 12.584 | Bicyclo[4.1.0]heptane, 3,7,7-trimethyl- (CAS)                                       | Carane               | 6658263   | 2.66  |
| 6     | 12.624 |                                                                                     |                      |           |       |
| 7     | 12.682 | Bicyclo[2.2.1]heptane, 2,2-dimethyl-3-methylene- (CAS)                              | Camphene             | 7749386   | 3.1   |
| 8     | 14.052 | Cyclohexene, 4-methyl-1-(1-methylethyl)- (CAS)                                      | Menthomenthene       | 16360436  | 6.54  |
| 9     | 16.042 | Bicyclo[7.2.0]undec-4-ene, 4,11,11-trimethyl-8-methylene-, [1R-(1R*,4E,9S*)]- (CAS) | .beta.-Caryophyllene | 5010578   | 2     |
| Total |        |                                                                                     |                      | 250180995 | 99.99 |

**Table S5.** Identified compounds, peak area and area percentage in sample TE3.0 at 0 hours.

| Pk#   | Rt     | Name (CAS)                                                                                                                   | Name             | Peak Area | Area % |
|-------|--------|------------------------------------------------------------------------------------------------------------------------------|------------------|-----------|--------|
| 1     | 9.962  | 2-Oxabicyclo[2.2.2]octane, 1,3,3-trimethyl- (CAS)                                                                            | 1,8-Cineole      | 6905461   | 1.26   |
| 32    | 12.056 | Cyclohexanone, 5-methyl-2-(1-methylethyl)- (CAS)                                                                             | Menthone         | 82324153  | 1.50   |
| 3     | 12.2   |                                                                                                                              |                  |           |        |
| 4     | 12.271 | Cyclohexene, 4-methyl-1-(1-methylethyl)- (CAS)                                                                               | 3-p-Menthene     | 34758370  | 6.33   |
| 5     | 12.415 | Cyclohexanol, 5-methyl-2-(1-methylethyl)-, (1.alpha.,2.beta.,5.alpha.)-(.-.-)- Bicyclo[4.1.0]heptane, 3,7,7-trimethyl- (CAS) | Menthol, (.+.-)- | 343338314 | 62.57  |
| 6     | 12.578 |                                                                                                                              |                  |           |        |
| 7     | 12.617 |                                                                                                                              |                  |           |        |
| 8     | 12.676 | Bicyclo[2.2.1]heptane, 2,2-dimethyl-3-methylene- (CAS)                                                                       | CAMPHENE         | 11147153  | 2.03   |
| 9     | 13.596 | 2-Cyclohexen-1-one, 3-methyl-6-(1-methylethyl)- (CAS)                                                                        | Piperitone       | 3533417   | 0.64   |
| 10    | 14.039 | Cyclohexene, 4-methyl-1-(1-methylethyl)- (CAS)                                                                               | 3-p-Menthene     | 43285553  | 7.89   |
| 11    | 16.016 | Cyclohexanol, 5-methyl-2-(1-methylethyl)-, (1.alpha.,2.beta.,5.alpha.)-(.-.-)-                                               | Menthol, (.+.-)- | 13212265  | 2.41   |
| Total |        |                                                                                                                              |                  | 548726005 | 100    |

**Table S6.** Identified compounds, peak area and area percentage in sample TE3.3 at 3 hours.

| Pk#   | Rt     | Name (CAS)                                                                                                                                         | Name                 | Peak Area | Area % |
|-------|--------|----------------------------------------------------------------------------------------------------------------------------------------------------|----------------------|-----------|--------|
| 1     | 9.956  | 2-Oxabicyclo[2.2.2]octane, 1,3,3-trimethyl- (CAS)                                                                                                  | 1,8-Cineole          | 5987628   | 1.20   |
| 2     | 12.049 | Cyclohexanone, 5-methyl-2-(1-methylethyl)- (CAS)                                                                                                   | Menthone             | 83691924  | 16.81  |
| 3     | 12.193 |                                                                                                                                                    |                      |           |        |
| 4     | 12.265 |                                                                                                                                                    |                      |           |        |
| 11    | 14.039 | Cyclohexene, 4-methyl-1-(1-methylethyl)- (CAS)                                                                                                     | 3-p-Menthene         | 78330671  | 15.74  |
| 5     | 12.415 | Cyclohexanol, 5-methyl-2-(1-methylethyl)-, [1R-(1.alpha.,2.beta.,5.alpha.)]- (CAS)                                                                 | 1-Menthol            | 295462908 | 59.35  |
| 6     | 12.578 | Bicyclo[4.1.0]heptane, 3,7,7-trimethyl- (CAS)                                                                                                      | Carane               | 5055044   | 1.02   |
| 7     | 12.61  |                                                                                                                                                    |                      |           |        |
| 8     | 12.669 | Bicyclo[2.2.1]heptane, 2,2-dimethyl-3-methylene- (CAS)                                                                                             | Camphene             | 4293082   | 0.86   |
| 9     | 13.335 | Cyclohexanone, 5-methyl-2-(1-methylethylidene)-, (R)- (CAS)                                                                                        | Pulegone             | 2804228   | 0.56   |
| 10    | 13.582 | 2-Cyclohexen-1-one, 3-methyl-6-(1-methylethyl)- (CAS)                                                                                              | Piperitone           | 5209313   | 1.05   |
| 12    | 15.363 | Cyclobuta[1,2:3,4]dicyclopentene, decahydro-3a-methyl-6-methylene-1-(1-methylethyl)-, [1S-(1.alpha.,3a.alpha.,3b.beta.,6a.beta.,6b.alpha.)]- (CAS) | .beta.-Bourbonene    | 350411    | 0.07   |
| 13    | 16.009 | Bicyclo[7.2.0]undec-4-ene, 4,11,11-trimethyl-8-methylene-, [1R-(1R*,4E,9S*)]- (CAS)                                                                | .beta.-Caryophyllene | 16618124  | 3.34   |
| Total |        |                                                                                                                                                    |                      | 497803334 | 100    |

**Table S7.** Identified compounds, peak area and area percentage in sample TE3.6 at 6 hours.

| Pk#   | Rt     | Name (CAS)                                                                                                                                         | Name                 | Peak Area | Area % |
|-------|--------|----------------------------------------------------------------------------------------------------------------------------------------------------|----------------------|-----------|--------|
| 1     | 9.962  | 2-Oxabicyclo[2.2.2]octane, 1,3,3-trimethyl- (CAS)                                                                                                  | 1,8-Cineole          | 2526635   | 0.62   |
| 2     | 12.056 | Cyclohexanone, 5-methyl-2-(1-methylethyl)- (CAS)                                                                                                   | Menthone             | 47949030  | 11.79  |
| 3     | 12.206 |                                                                                                                                                    |                      |           |        |
| 4     | 12.271 | Cyclohexane, 1-methyl-4-(1-methylethylidene)- (CAS)                                                                                                | 4(8)-p-Menthene      | 24203987  | 5.95   |
| 5     | 12.415 | Cyclohexanol, 5-methyl-2-(1-methylethyl)-, (1.alpha.,2.beta.,5.alpha.)-(.-.-)-                                                                     | Menthol, (.-.-)-     | 255014388 | 62.74  |
| 6     | 12.584 | Bicyclo[4.1.0]heptane, 3,7,7-trimethyl- (CAS)                                                                                                      | Carane               | 7862684   | 1.93   |
| 7     | 12.617 |                                                                                                                                                    |                      |           |        |
| 8     | 12.676 | Bicyclo[2.2.1]heptane, 2,2-dimethyl-3-methylene- (CAS)                                                                                             | Camphene             | 8854971   | 2.18   |
| 9     | 13.595 | 2-Cyclohexen-1-one, 3-methyl-6-(1-methylethyl)- (CAS)                                                                                              | Piperitone           | 2468819   | 0.61   |
| 10    | 14.045 | Cyclohexene, 4-methyl-1-(1-methylethyl)- (CAS)                                                                                                     | 3-p-Menthene         | 37228398  | 9.16   |
| 11    | 15.376 | Cyclobuta[1,2:3,4]dicyclopentene, decahydro-3a-methyl-6-methylene-1-(1-methylethyl)-, [1S-(1.alpha.,3a.alpha.,3b.beta.,6a.beta.,6b.alpha.)]- (CAS) | .beta.-Bourbonene    | 261444    | 0.06   |
| 12    | 16.022 | Bicyclo[7.2.0]undec-4-ene, 4,11,11-trimethyl-8-methylene-, [1R-(1R*,4E,9S*)]- (CAS)                                                                | .beta.-Caryophyllene | 20105039  | 4.95   |
| Total |        |                                                                                                                                                    |                      | 406475395 | 99.99  |

**Table S8.** Identified compounds, peak area and area percentage in sample TE6.0 at 0 hours.

| Pk#   | Rt     | Name (CAS)                                                                          | Name                 | Peak Area | Area % |
|-------|--------|-------------------------------------------------------------------------------------|----------------------|-----------|--------|
| 1     | 9.962  | 2-Oxabicyclo[2.2.2]octane, 1,3,3-trimethyl- (CAS)                                   | 1,8-Cineole          | 659285    | 0.32   |
| 2     | 12.056 | Cyclohexanone, 5-methyl-2-(1-methylethyl)- (CAS)                                    | Menthone             | 9969287   | 4.9    |
| 3     | 12.206 |                                                                                     |                      |           |        |
| 4     | 12.278 | Cyclohexane, 1-methyl-4-(1-methylethylidene)- (CAS)                                 | 4(8)-p-Menthene      | 7808433   | 3.84   |
| 5     | 12.402 | Cyclohexanol, 5-methyl-2-(1-methylethyl)-, (1.alpha.,2.beta.,5.alpha.)-(.-.-)-      | Menthol, (.+-.)-     | 162201717 | 79.72  |
| 6     | 12.578 | Bicyclo[4.1.0]heptane, 3,7,7-trimethyl-, (1.alpha.,3.alpha.,6.alpha.)- (CAS)        | trans-Carane         | 3129590   | 1.54   |
| 7     | 12.617 | Bicyclo[4.1.0]heptane, 3,7,7-trimethyl- (CAS)                                       | Carane               | 2590853   | 1.27   |
| 8     | 12.682 | Bicyclo[4.1.0]hept-3-ene, 3,7,7-trimethyl- (CAS)                                    | .delta.3-Carene      | 6824229   | 3.35   |
| 9     | 14.046 | Cyclohexene, 4-methyl-1-(1-methylethyl)- (CAS)                                      | 3-p-Menthene         | 8616714   | 4.24   |
| 10    | 16.022 | Bicyclo[7.2.0]undec-4-ene, 4,11,11-trimethyl-8-methylene-, [1R-(1R*,4E,9S*)]- (CAS) | .beta.-Caryophyllene | 1659216   | 0.82   |
| Total |        |                                                                                     |                      | 203459322 | 100    |

**Table S9.** Identified compounds, peak area and area percentage in sample TE6.3 at 3 hours.

| Pk#   | Rt     | Name (CAS)                                                                          | Name                | Peak Area | Area % |
|-------|--------|-------------------------------------------------------------------------------------|---------------------|-----------|--------|
| 1     | 9.962  | 2-Oxabicyclo[2.2.2]octane, 1,3,3-trimethyl- (CAS)                                   | 1,8-Cineole         | 395415    | 0.22   |
| 2     | 12.056 | Cyclohexanone, 5-methyl-2-(1-methylethyl)- (CAS)                                    | Menthone            | 14468297  | 7.89   |
| 3     | 12.206 |                                                                                     |                     |           |        |
| 4     | 12.278 | Cyclohexene, 4-methyl-1-(1-methylethyl)- (CAS)                                      | 3-p-Menthene        | 21181642  | 11.55  |
| 10    | 14.046 |                                                                                     |                     |           |        |
| 5     | 12.415 | Cyclohexanol, 5-methyl-2-(1-methylethyl)-, (1.alpha.,2.beta.,5.alpha.)-(.-.-)-      | Menthol, (.+-.)-    | 140003637 | 76.37  |
| 6     | 12.584 | Bicyclo[4.1.0]heptane, 3,7,7-trimethyl- (CAS)                                       | Carane              | 2564121   | 1.4    |
| 7     | 12.617 |                                                                                     |                     |           |        |
| 8     | 12.682 | Bicyclo[4.1.0]hept-3-ene, 3,7,7-trimethyl- (CAS)                                    | .delta.3-Carene     | 1726149   | 0.94   |
| 9     | 13.602 | 2-Cyclohexen-1-one, 3-methyl-6-(1-methylethyl)- (CAS)                               | Piperitone          | 1131120   | 0.62   |
| 11    | 16.029 | Bicyclo[7.2.0]undec-4-ene, 4,11,11-trimethyl-8-methylene-, [1R-(1R*,4E,9S*)]- (CAS) | trans-Caryophyllene | 1852343   | 1.01   |
| Total |        |                                                                                     |                     | 183322723 | 100    |

**Table S10.** Identified compounds, peak area and area percentage in sample TE6.6 at 6 hours.

| Pk#   | Rt     | Name (CAS)                                                                    | Name            | Peak Area | Area % |
|-------|--------|-------------------------------------------------------------------------------|-----------------|-----------|--------|
| 1     | 12.063 | Cyclohexanone, 5-methyl-2-(1-methylethyl)-, cis- (CAS)                        | ISO MENTHONE    | 1031200   | 0.91   |
| 2     | 12.206 |                                                                               |                 |           |        |
| 3     | 12.278 | Cyclohexene, 4-methyl-1-(1-methylethyl)- (CAS)                                | 3-p-Menthene    | 8191966   | 7.23   |
| 9     | 14.052 |                                                                               |                 |           |        |
| 4     | 12.402 | Cyclohexanol, 5-methyl-2-(1-methylethyl)-, (1.alpha.,2.beta.,5.alpha.)-(.-.)- | Menthol, (.-.)- | 93985485  | 83     |
| 5     | 12.578 | Bicyclo[4.1.0]heptane, 3,7,7-trimethyl-                                       | Carane          | 3540972   | 3.12   |
| 6     | 12.617 | (CAS)                                                                         |                 |           |        |
| 7     | 12.689 | Bicyclo[2.2.1]heptane, 2,2-dimethyl-3-methylene- (CAS)                        | Camphene        | 5911683   | 5.22   |
| 8     | 13.615 | 1,3-Dimethyl-1-cyclohexene                                                    |                 | 163955    | 0.14   |
| 10    | 16.029 | EXO-BICYCLO[4.1.0]HEPT-3-EN-7-CARBAMIC ACID                                   |                 | 408734    | 0.36   |
| Total |        |                                                                               |                 | 113233995 | 99.98  |

**Table S11.** Total peak area of volatile compounds and Area% for sample TE1.

| Sample code | Sum of the peak areas | Sum of the peak areas (%) |
|-------------|-----------------------|---------------------------|
| TE1.0       | 396387990             | 100.00                    |
| TE1.3       | 368521615             | 92.97                     |
| TE1.6       | 250180995             | 63.12                     |

**Table S12.** Total peak area of volatile compounds and Area% for sample TE3.

| Sample code | Sum of the peak areas | Sum of the peak areas (%) |
|-------------|-----------------------|---------------------------|
| TE3.0       | 548726005             | 100.00                    |
| TE3.3       | 497803334             | 90.72                     |
| TE3.6       | 406475395             | 74.08                     |

**Table S13.** Total peak area of volatile compounds and Area% for sample TE6.

| Sample code | Sum of the peak areas | Sum of the peak areas (%) |
|-------------|-----------------------|---------------------------|
| TE6.0       | 203459322             | 100                       |
| TE6.3       | 183322723             | 90.10                     |
| TE6.6       | 113233995             | 55.65                     |
